# Supplementary material for: Incorporation of a self-aligned selective emitter to realize highly efficient (12.8%) Si nanowire solar cells
Source: Royal Society of Chemistry journal article supplement (doi:10.1039/c4nr00455h), 2014-01-01

## Supplementary Information

# Incorporation of a self-aligned selective emitter to realize highly efficient (12.8%) Si nanowire solar cells

*Han-Don Um,<sup>a,†</sup> Kwang-Tae Park,<sup>a,†</sup> Jin-Young Jung,<sup>a</sup> Xiaopeng Li,<sup>b,c</sup> Keya Zhou,<sup>a</sup> Sang-Won Jee<sup>a</sup> and Jung-Ho Lee<sup>\*a</sup>*

<sup>a</sup>Department of Materials and Chemical Engineering, Hanyang University, Ansan, 426-791, Korea.

<sup>b</sup>Max-Planck Institute of Microstructure Physics, Weinberg 2, 06120 Halle, Germany.

<sup>c</sup>Fraunhofer Institute for Mechanics of Materials, Walter-Hülse-Str. 1, 06120 Halle, Germany.

<sup>†</sup>These authors contributed equally to this work.

Email: [junggho@hanyang.ac.kr](mailto:junggho@hanyang.ac.kr)

**Figure S1.** FETEM images of (a) porous Si at the NW tip, (b) tiny Ag NPs, and (c) dense Si at the bottom of a NW.

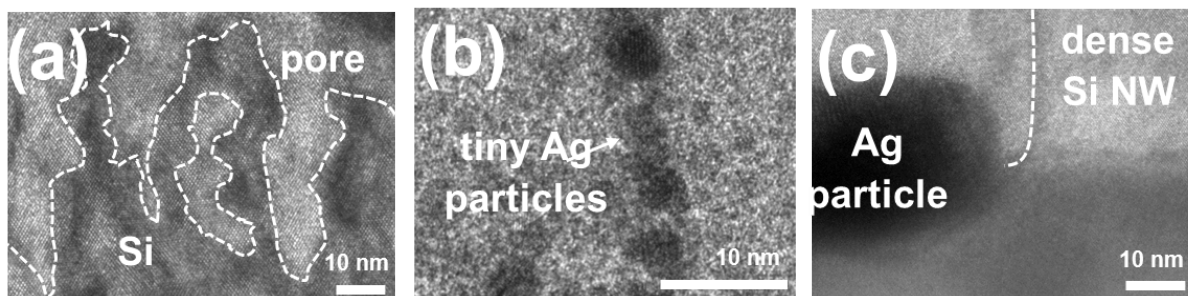

**Figure S2.** Reflectance spectra of planar and selective-emitter NW cells.

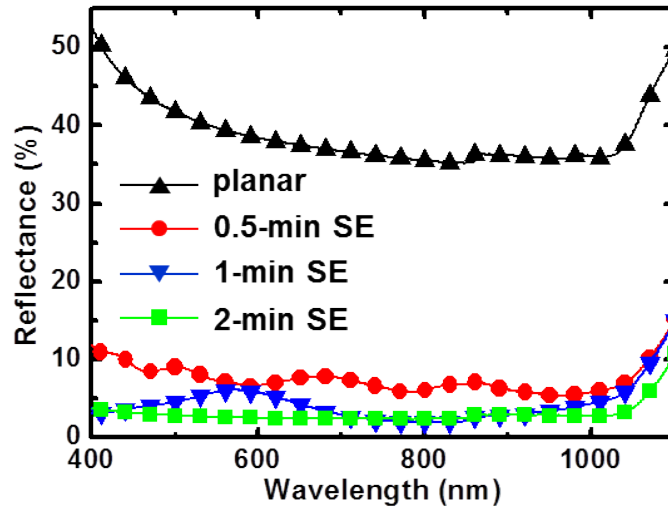

**Figure S3.** Schematics of (a) planar, (b) selective-emitter-NW, and (c) conventional NW solar cells used to measure contact resistivity using the transmission line model.

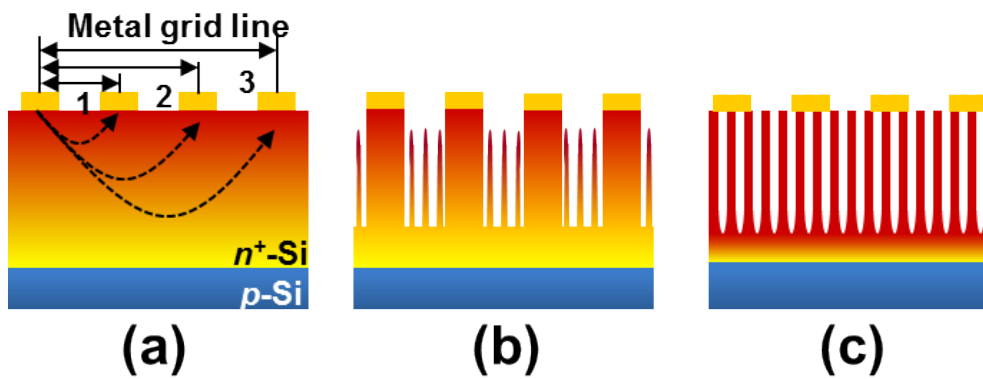

Supplement: c4nr00455h1.pdf [file c4nr00455h1.pdf]
